# Supplementary material for: Potential for city parks to reduce exposure to BTEX in air
Source: Royal Society of Chemistry journal article supplement (doi:10.1039/c8em00252e), 2018-11-07
Supplement: c8em00252e1.pdf [file c8em00252e1.pdf]

Electronic Supplemental Information (ESI) for Environmental Science: Processes and Impacts.  
This journal is © The Royal Society of Chemistry 2018

Supplementary Information  
for  
**Potential for City Parks to Reduce Exposure to BTEX in Air**

M. J. Milazzo,<sup>a</sup> J. M. Gohlke,<sup>b</sup> D.L. Gallagher,<sup>a</sup> A.A. Scott,<sup>c</sup> B.F. Zaitchik,<sup>c</sup> L. C. Marr<sup>a</sup>

<sup>a</sup>Department of Civil and Environmental Engineering, Virginia Tech, Blacksburg, Virginia, USA

<sup>b</sup>Department of Population Health Sciences, Virginia Tech, Blacksburg, Virginia, USA

<sup>c</sup>Department of Earth and Planetary Sciences, Johns Hopkins University, Baltimore, Maryland, USA

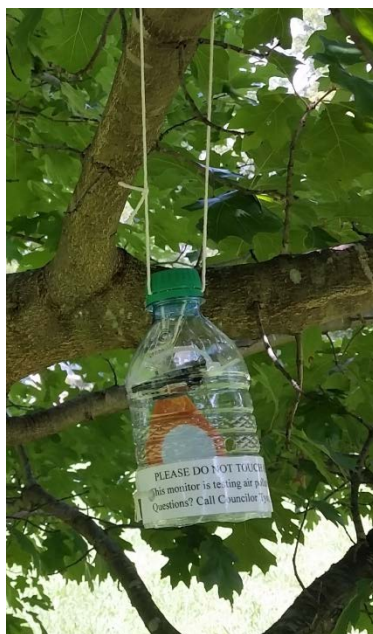

Fig. 1S. Picture of deployed passive organic vapor monitor and iButton with plastic housing.

Table 1S. Temperature (mean  $\pm$  standard deviation) and precipitation (total sum) data during the sampling campaign from stations in Birmingham (WBAN ID 13876) and Selma, AL (WBAN ID 63897). The weather station in Selma, AL is the closest one to the sampling location in Camden, AL. Data acquired from the National Centers for Environmental Information.<sup>1</sup> The transition between Week 1 and Week 2 took place on July 15, 2017.

| Sampling Campaign | Date          | Birmingham       |                    | Selma            |                    |
|-------------------|---------------|------------------|--------------------|------------------|--------------------|
|                   |               | Temperature [°C] | Precipitation [mm] | Temperature [°C] | Precipitation [mm] |
|                   | July 8, 2017  | 26 $\pm$ 2.3     | TRACE              | 26 $\pm$ 2.8     | 15.7               |
|                   | July 9, 2017  | 26 $\pm$ 3.7     | 0                  | 25 $\pm$ 3.7     | 1.8                |
|                   | July 10, 2017 | 27 $\pm$ 5.1     | 0                  | 26 $\pm$ 3.4     | 0                  |
| Week 1            | July 11, 2017 | 25 $\pm$ 2.8     | 35.3               | 26 $\pm$ 3.3     | 0                  |
|                   | July 12, 2017 | 27 $\pm$ 3.2     | 0                  | 26 $\pm$ 2.9     | 0                  |
|                   | July 13, 2017 | 28 $\pm$ 2.8     | TRACE              | 27 $\pm$ 3.5     | 0                  |
|                   | July 14, 2017 | 26 $\pm$ 2.7     | 29                 | 27 $\pm$ 3.9     | 0                  |
| -----             | July 15, 2017 | 25 $\pm$ 2.2     | 3                  | 27 $\pm$ 3.5     | 0.5                |
|                   | July 16, 2017 | 25 $\pm$ 2.7     | 11.4               | 25 $\pm$ 2.4     | 0                  |
|                   | July 17, 2017 | 27 $\pm$ 3.0     | 0                  | 26 $\pm$ 2.6     | 4.3                |
|                   | July 18, 2017 | 27 $\pm$ 3.9     | 0                  | 26 $\pm$ 3.7     | 0                  |
| Week 2            | July 19, 2017 | 29 $\pm$ 3.9     | 0                  | 27 $\pm$ 4.1     | 0                  |
|                   | July 20, 2017 | 29 $\pm$ 3.3     | 0                  | 28 $\pm$ 4.1     | 0                  |
|                   | July 21, 2017 | 30 $\pm$ 3.6     | 0                  | 26 $\pm$ 3.9     | 0.8                |
|                   | July 22, 2017 | 29 $\pm$ 3.0     | 0                  | 27 $\pm$ 4.4     | 0                  |

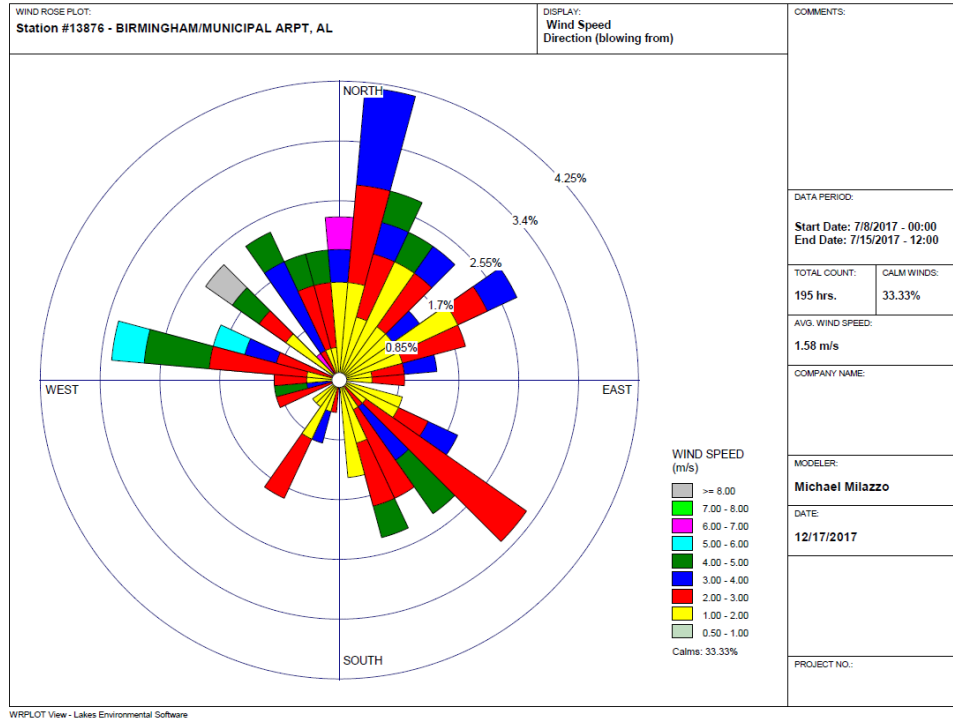

Fig. 2S. Wind rose plot<sup>2</sup> during Week 1 from station in Birmingham, AL (WBAN ID 13876). Data acquired from the National Centers for Environmental Information.<sup>1</sup>

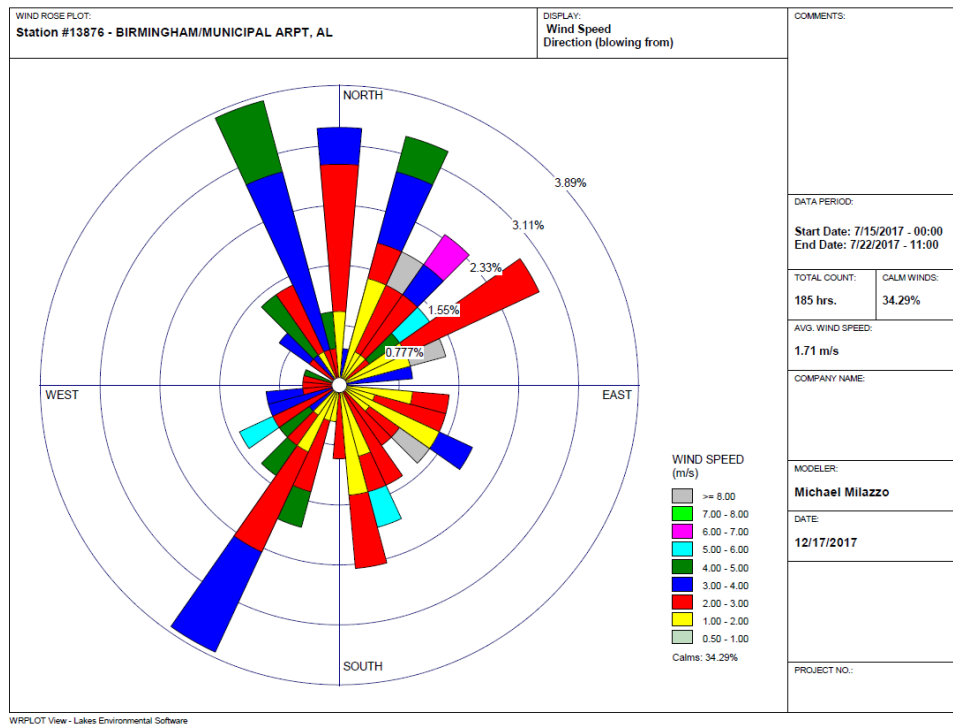

Fig. 3S. Wind rose plot<sup>2</sup> during Week 2 from station in Birmingham, AL (WBAN ID 13876). Data acquired from the National Centers for Environmental Information.<sup>1</sup>

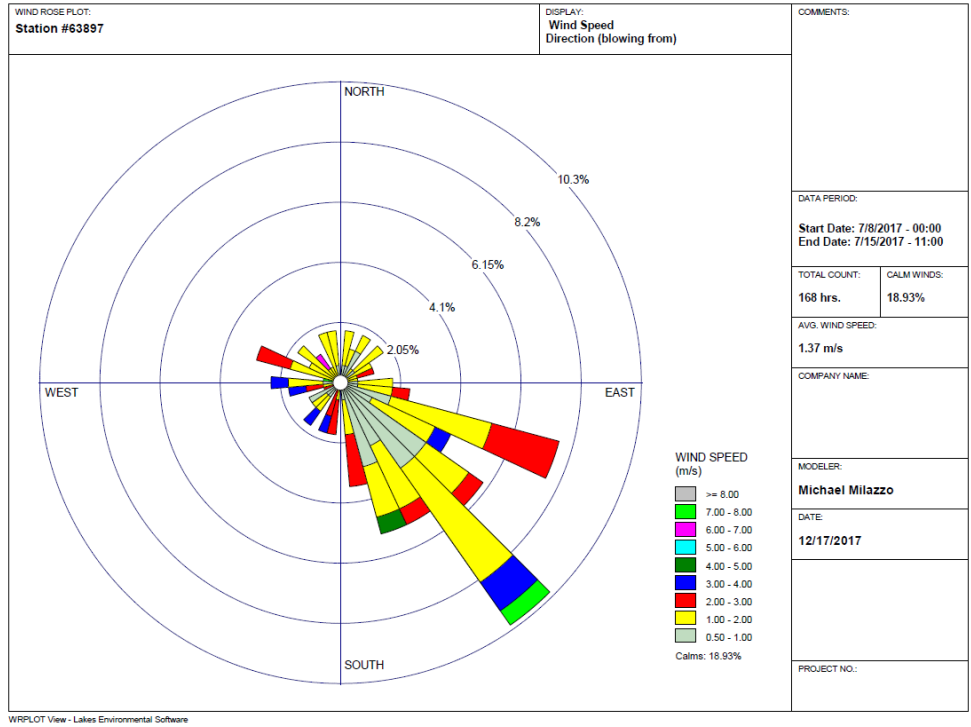

Fig. 4S. Wind rose plot<sup>2</sup> during Week 1 from station nearest Camden in Selma, AL (WBAN ID 63897). Data acquired from the National Centers for Environmental Information.<sup>1</sup>

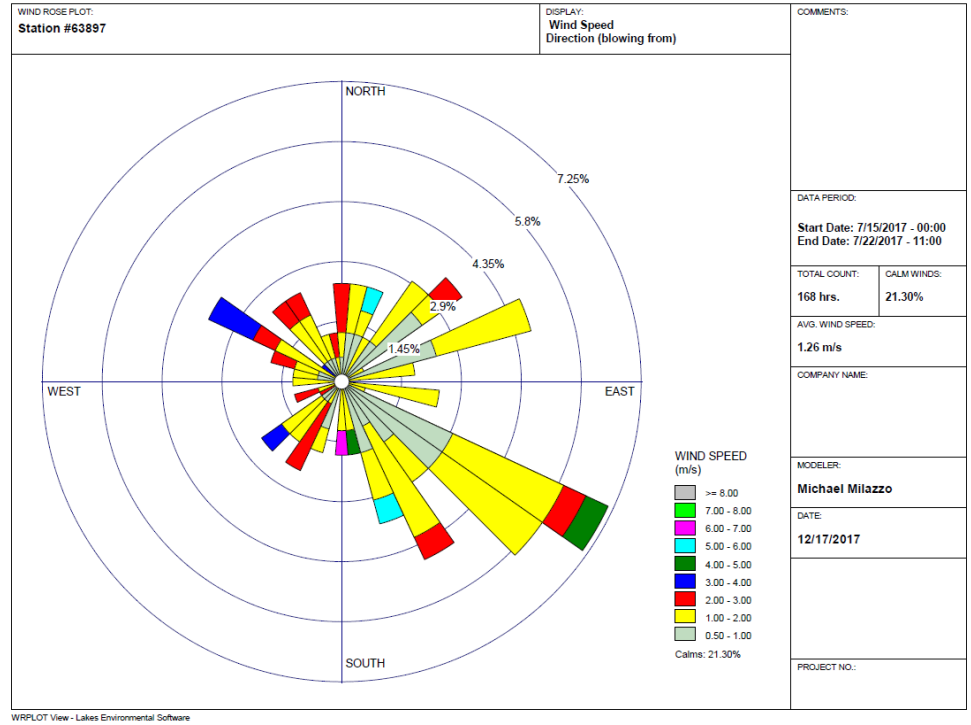

Fig. 5S. Wind rose plot<sup>2</sup> during Week 2 from station nearest Camden in Selma, AL (WBAN ID 63897). Data acquired from the National Centers for Environmental Information.<sup>1</sup>

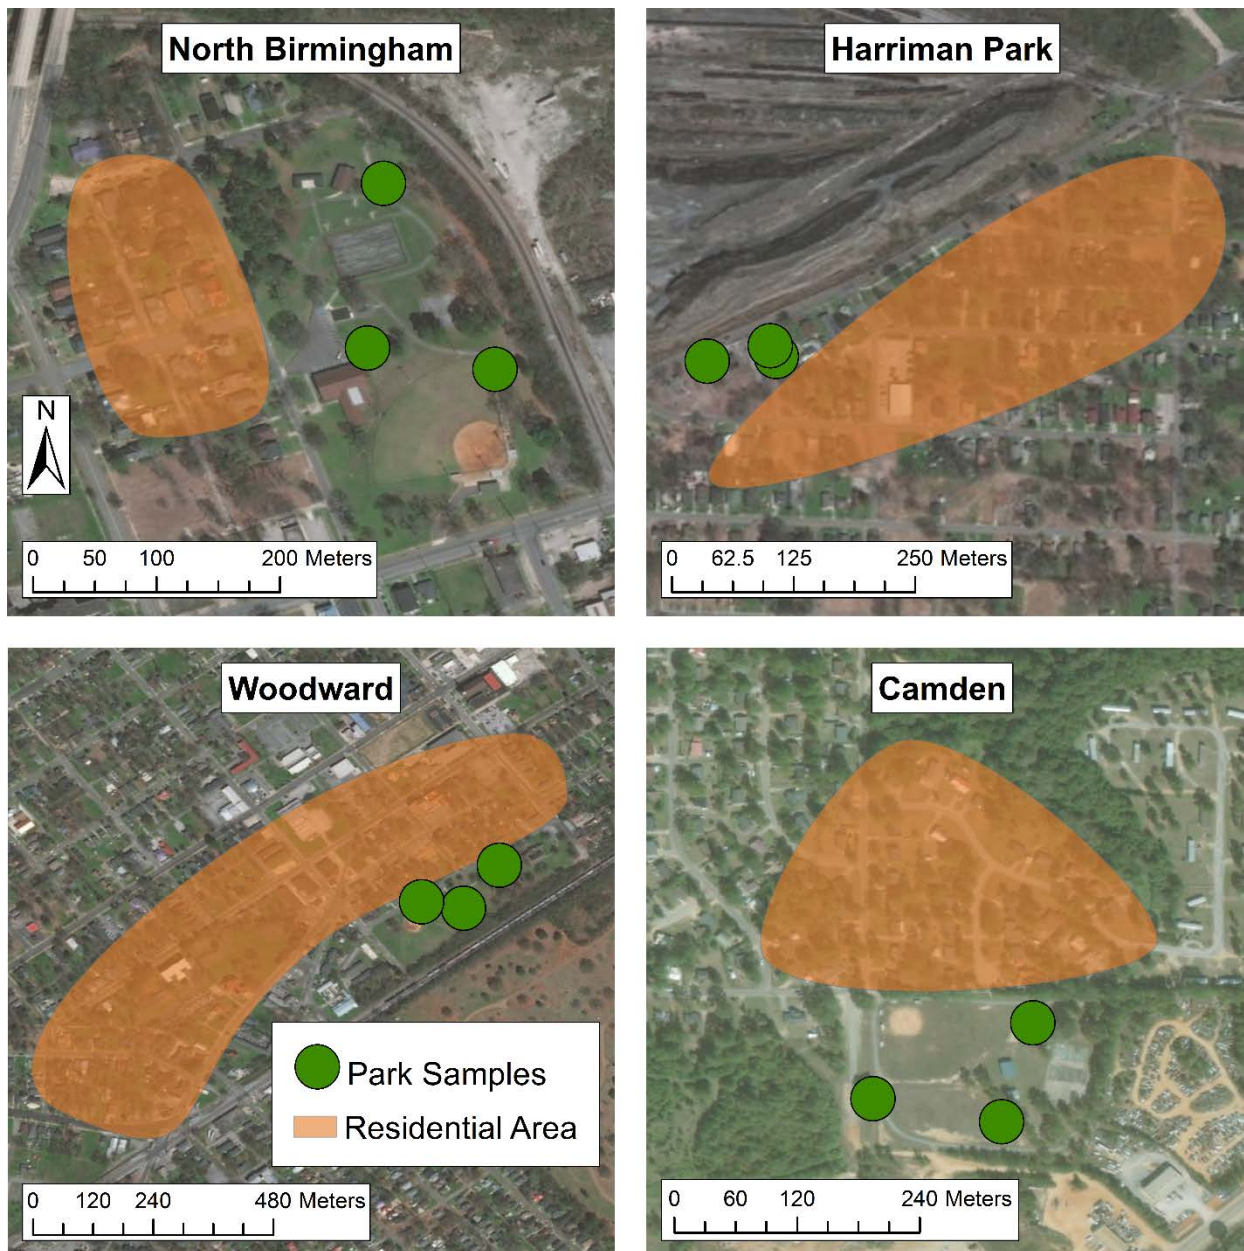

Fig. 6S. Sampling locations in (clockwise from top-left): North Birmingham, Harriman Park, Woodward, and Camden. Specific sample locations in the residential areas are not shown in order to maintain the privacy and confidentiality of the participants.

Table 2S. GC-MS method detection limits for BTEX and surrogate standard, conducted per EPA Method Detection Limit Procedure.<sup>3</sup> The equivalent gas-phase concentration, assuming a 7-day sampling period with this type of organic vapor monitor, is also shown.

|                                                  | Benzene | Toluene | Ethylbenzene | m-,p-Xylene | o-Xylene | p-Bromofluorobenzene |
|--------------------------------------------------|---------|---------|--------------|-------------|----------|----------------------|
| Liquid extract<br>[ng mL <sup>-1</sup> ]         | 31.4    | 23.9    | 3.80         | 5.76        | 5.67     | 4.15                 |
| Gas-phase<br>equivalent<br>[μg m <sup>-3</sup> ] | 0.132   | 0.113   | 0.0207       | 0.0314      | 0.0309   | N/A                  |

Table 3S. BTEX and surrogate standard recovery [%] determined by desorption efficiency tests.

| Mass<br>Loaded<br>[ng] | Benzene | Toluene | Ethylbenzene | m-,p-Xylene | o-Xylene | p-Bromofluorobenzene |
|------------------------|---------|---------|--------------|-------------|----------|----------------------|
| 75                     | 92.6    | 130     | 73.2         | 80.6        | 81.7     | 57.1                 |
|                        | 122     | 138     | 83.9         | 96.0        | 92.1     | 70.0                 |
|                        | 133     | 145     | 88.6         | 103         | 102      | 72.5                 |
| 150                    | 108     | 110     | 79.1         | 86.4        | 86.5     | 64.1                 |
|                        | 117     | 121     | 89.2         | 93.5        | 94.2     | 70.8                 |
|                        | 106     | 116     | 84.1         | 93.6        | 91.9     | 65.7                 |
| 750                    | 102     | 111     | 109          | 112         | 105      | 89.6                 |
|                        | 96.3    | 119     | 114          | 117         | 109      | 78.4                 |
|                        | 89.7    | 109     | 105          | 109         | 102      | 74.4                 |
| 1875                   | 88.3    | 97.2    | 100          | 103         | 98.8     | 86.5                 |
|                        | 99.2    | 113     | 117          | 118         | 112      | 76.5                 |
|                        | 93.7    | 108     | 113          | 113         | 106      | 80.3                 |

Table 4S. Method, trip, and reagent blanks (n=4 each) for BTEX and surrogate standard [ng mL<sup>-1</sup>]. NF signifies “not found” while \* denotes 25% of blanks (1 of 4) were not detected.

| Blank type        | Benzene | Toluene     | Ethylbenzene | m-,p-Xylene | o-Xylene | p-Bromofluorobenzene |
|-------------------|---------|-------------|--------------|-------------|----------|----------------------|
| Method<br>blanks  | NF      | 25.9 ± 1.6* | NF           | NF          | NF       | 56.4 ± 4.1           |
| Trip<br>blanks    | NF      | 29.9 ± 1.3  | NF           | NF          | NF       | 63.2 ± 2.1           |
| Reagent<br>blanks | NF      | NF          | NF           | NF          | NF       | NF                   |

*Effect of Rain Cover.* A separate experiment was conducted to determine whether the rain cover used to protect the passive samplers might have affected the measurements. Four passive samplers, two with rain covers and two without, were deployed for one week (August 13–21, 2018) under an eave at a residence in Blacksburg, VA. These passive samplers, along with one field blank, were analyzed in the laboratory using the same methods described in the paper. The results are presented in Table 5S. According to t-tests, concentrations were not significantly different with and without rain covers, except for m-,p-xylene ( $p=0.02$ ), for which concentrations were 7% higher without the rain covers. Therefore, the rain covers were presumed not to introduce bias to the results.

Table 5S. BTEX concentrations [ $\mu\text{g m}^{-3}$ ] and p-bromofluorobenzene surrogate standard recovery [%] for experiment conducted to assess potential bias of rain cover. Concentrations in field blanks [ $\mu\text{g m}^{-3}$ ], solvent blanks [ $\text{ng mL}^{-1}$ ], and method blanks [ $\text{ng mL}^{-1}$ ] are also provided.

| Passive Sampler    | Benzene | Toluene            | Ethylbenzene       | m-,p-Xylene | o-Xylene | p-Bromofluorobenzene |
|--------------------|---------|--------------------|--------------------|-------------|----------|----------------------|
| With rain cover    | 0.382   | 0.803              | 0.113              | 0.190       | 0.127    | 76.1                 |
|                    | 0.150   | 0.764              | 0.106              | 0.188       | 0.125    | 76.4                 |
| Without rain cover | 0.315   | 0.781              | 0.114              | 0.202       | 0.127    | 76.4                 |
|                    | 0.261   | 0.873              | 0.127              | 0.205       | 0.151    | 86.4                 |
| Field blank        | NF      | 0.131 <sup>a</sup> | 0.021 <sup>a</sup> | NF          | NF       | 66.7                 |
| Solvent blank      | NF      | NF                 | NF                 | NF          | NF       | NF                   |
|                    | NF      | NF                 | NF                 | NF          | NF       | NF                   |
| Method blank       | NF      | 26.2               | NF                 | NF          | NF       | 74.8                 |
|                    | NF      | 26.7               | 4.81               | NF          | NF       | 81.5                 |

<sup>a</sup> Calculated assuming a 7-day exposure period. The concentrations in the extract were 30.1  $\text{ng mL}^{-1}$  and 4.1  $\text{ng mL}^{-1}$  for toluene and ethylbenzene, respectively.

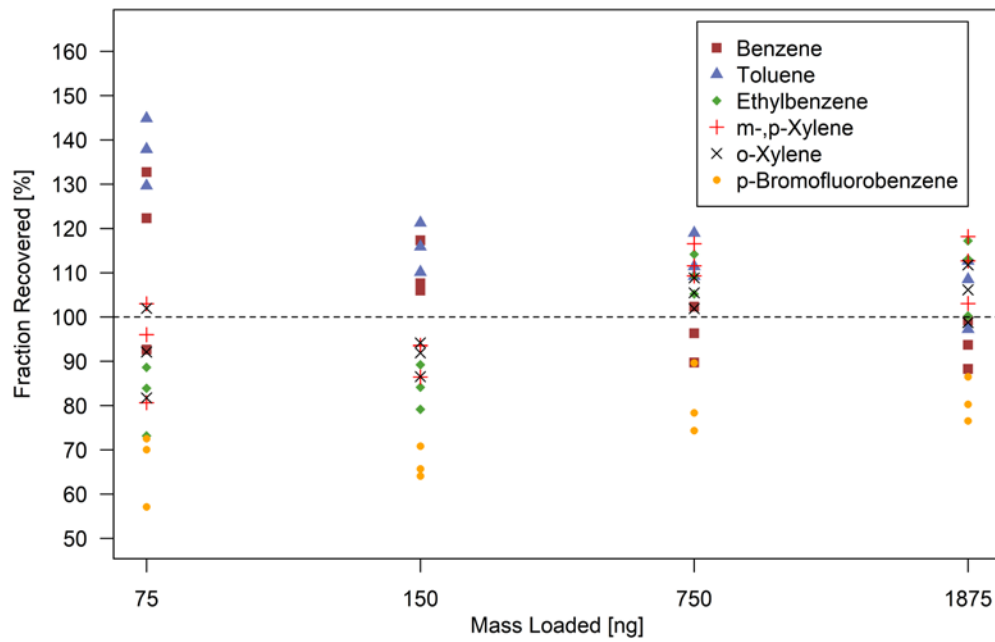

Fig. 7S. BTEX and surrogate standard percent recovery determined by desorption efficiency tests. Dashed line is 100% recovery.



Table 6S. All BTEX concentrations by site and week [ $\mu\text{g m}^{-3}$ ].

| Name             | Type        | Site | Week | Benzene | Toluene | Ethylbenzene | m-,p-Xylene | o-Xylene | Surrogate Recovery Efficiency [%] |
|------------------|-------------|------|------|---------|---------|--------------|-------------|----------|-----------------------------------|
| North Birmingham | Park        | A    | 1    | 2.51    | 1.67    | 0.291        | 1.13        | 0.426    | 71.1                              |
|                  |             |      | 2    | 1.83    | 1.30    | 0.256        | 0.989       | 0.366    | 56.4                              |
|                  |             | B    | 1    | 1.70    | 1.36    | 0.251        | 0.936       | 0.353    | 72.5                              |
|                  |             |      | 2    | 1.92    | 1.41    | 0.288        | 1.10        | 0.394    | 66.7                              |
|                  |             | C    | 1    | 1.31    | 1.02    | 0.170        | 0.654       | 0.247    | 61.0                              |
|                  |             |      | 2    | 1.62    | 1.32    | 0.251        | 0.975       | 0.350    | 60.6                              |
|                  | Residential | A    | 1    | 1.75    | 1.51    | 0.266        | 1.02        | 0.392    | 62.4                              |
|                  |             |      | 2    | 1.53    | 1.44    | 0.279        | 1.08        | 0.385    | 59.4                              |
|                  |             | B    | 1    | 1.64    | 1.29    | 0.224        | 0.846       | 0.322    | 58.5                              |
|                  |             |      | 2    | 1.47    | 1.38    | 0.264        | 1.05        | 0.377    | 67.2                              |
|                  |             | C    | 1    | 2.01    | 1.57    | 0.267        | 1.03        | 0.395    | 58.2                              |
|                  |             |      | 2    | 1.75    | 2.26    | 0.405        | 1.57        | 0.600    | 63.7                              |
| Harriman Park    | Park        | A    | 1    | 1.83    | 1.77    | 0.357        | 1.37        | 0.515    | 65.5                              |
|                  |             |      | 2    | 1.57    | 1.94    | 0.459        | 1.75        | 0.675    | 72.4                              |
|                  |             | B    | 1    | 2.08    | 1.66    | 0.312        | 1.21        | 0.472    | 68.5                              |
|                  |             |      | 2    | 1.17    | 1.30    | 0.289        | 1.12        | 0.422    | 65.6                              |
|                  |             | C    | 1    | 1.66    | 1.79    | 0.362        | 1.39        | 0.504    | 62.1                              |
|                  |             |      | 2    | 1.30    | 2.03    | 0.480        | 1.86        | 0.694    | 63.5                              |
|                  | Residential | A    | 1    | 1.63    | 1.86    | 0.350        | 1.37        | 0.548    | 61.3                              |
|                  |             |      | 2    | 1.44    | 1.76    | 0.394        | 1.54        | 0.577    | 67.5                              |
|                  |             | B    | 1    | 1.57    | 1.55    | 0.303        | 1.18        | 0.448    | 57.1                              |
|                  |             |      | 2    | 1.44    | 1.84    | 0.405        | 1.63        | 0.592    | 71.1                              |
|                  |             | C    | 1    | 1.62    | 2.03    | 0.431        | 1.58        | 0.640    | 60.4                              |
|                  |             |      | 2    | 1.41    | 2.18    | 0.463        | 1.80        | 0.678    | 81.7                              |
| Woodward         | Park        | A    | 1    | 0.608   | 2.14    | 0.303        | 1.03        | 0.416    | 60.5                              |
|                  |             |      | 2    | 0.558   | 2.09    | 0.305        | 1.03        | 0.418    | 58.3                              |
|                  |             | B    | 1    | 0.805   | 1.90    | 0.312        | 1.07        | 0.437    | 58.7                              |
|                  |             |      | 2    | 0.667   | 1.95    | 0.303        | 1.03        | 0.407    | 56.8                              |
|                  |             | C    | 1    | 0.660   | 1.74    | 0.274        | 0.960       | 0.390    | 52.9                              |
|                  |             |      | 2    | 0.768   | 2.21    | 0.339        | 1.15        | 0.471    | 64.5                              |
|                  | Residential | A    | 1    | 0.751   | 1.87    | 0.293        | 1.01        | 0.410    | 52.7                              |
|                  |             |      | 2    | 0.800   | 2.11    | 0.330        | 1.11        | 0.445    | 59.7                              |
|                  |             | B    | 1    | 0.693   | 1.91    | 0.319        | 1.15        | 0.468    | 47.1                              |
|                  |             |      | 2    | 0.906   | 2.69    | 0.458        | 1.55        | 0.619    | 69.0                              |
|                  |             | C    | 1    | 0.769   | 3.10    | 0.549        | 1.95        | 0.755    | 55.9                              |
|                  |             |      | 2    | 1.13    | 3.21    | 0.518        | 1.76        | 0.674    | 61.2                              |
| Camden           | Park        | A    | 1    | 0.142   | 0.542   | 0.065        | 0.230       | 0.084    | 53.1                              |
|                  |             |      | 2    | 0.301   | 1.06    | 0.186        | 0.632       | 0.242    | 50.5                              |
|                  |             | B    | 1    | 0.170   | 0.716   | 0.085        | 0.300       | 0.108    | 54.9                              |
|                  |             |      | 2    | 0.265   | 1.35    | 0.225        | 0.753       | 0.290    | 54.8                              |
|                  |             | C    | 1    | 0.169   | 0.472   | 0.062        | 0.191       | 0.073    | 54.1                              |
|                  |             |      | 2    | 0.325   | 0.861   | 0.141        | 0.473       | 0.189    | 46.0                              |
|                  | Residential | A    | 1    | 0.291   | 0.830   | 0.142        | 0.522       | 0.219    | 59.5                              |
|                  |             |      | 2    | 0.306   | 1.34    | 0.407        | 0.844       | 0.329    | 54.6                              |
|                  |             | B    | 1    | 0.285   | 0.707   | 0.108        | 0.321       | 0.115    | 60.6                              |
|                  |             |      | 2    | 0.306   | 1.12    | 0.223        | 0.598       | 0.230    | 57.9                              |
|                  |             | C    | 1    | 0.244   | 0.869   | 0.125        | 0.454       | 0.176    | 57.7                              |
|                  |             |      | 2    | 0.412   | 1.31    | 0.241        | 0.783       | 0.312    | 66.2                              |

Table 7S. BTEX concentrations [ $\mu\text{g m}^{-3}$ ] for Week 1, grouped by park name and location type.

| Name             | Type        | Benzene        | Toluene        | Ethylbenzene    | m-,p-Xylene    | o-Xylene        | Surrogate Recovery Efficiency [%] |
|------------------|-------------|----------------|----------------|-----------------|----------------|-----------------|-----------------------------------|
| North Birmingham | Park        | 1.84 ± 0.610   | 1.35 ± 0.325   | 0.237 ± 0.0614  | 0.905 ± 0.238  | 0.342 ± 0.0900  | 68.2 ± 6.24                       |
|                  | Residential | 1.80 ± 0.189   | 1.46 ± 0.150   | 0.252 ± 0.0248  | 0.963 ± 0.102  | 0.370 ± 0.0415  | 59.7 ± 2.37                       |
| Harriman Park    | Park        | 1.86 ± 0.211   | 1.74 ± 0.0715  | 0.344 ± 0.0274  | 1.32 ± 0.0992  | 0.497 ± 0.0223  | 65.4 ± 3.21                       |
|                  | Residential | 1.61 ± 0.0310  | 1.82 ± 0.243   | 0.362 ± 0.0650  | 1.38 ± 0.202   | 0.546 ± 0.0958  | 59.6 ± 2.22                       |
| Woodward         | Park        | 0.691 ± 0.102  | 1.93 ± 0.204   | 0.296 ± 0.0201  | 1.02 ± 0.0566  | 0.414 ± 0.0235  | 57.4 ± 3.95                       |
|                  | Residential | 0.738 ± 0.0395 | 2.29 ± 0.701   | 0.387 ± 0.141   | 1.37 ± 0.505   | 0.544 ± 0.185   | 51.9 ± 4.41                       |
| Camden           | Park        | 0.160 ± 0.0161 | 0.576 ± 0.126  | 0.0707 ± 0.0124 | 0.240 ± 0.0556 | 0.0884 ± 0.0179 | 54.1 ± 0.905                      |
|                  | Residential | 0.273 ± 0.0252 | 0.802 ± 0.0847 | 0.125 ± 0.0170  | 0.432 ± 0.102  | 0.170 ± 0.0524  | 59.3 ± 1.46                       |

Table 8S. BTEX concentrations [ $\mu\text{g m}^{-3}$ ] for Week 2, grouped by park name and location type.

| Name             | Type        | Benzene        | Toluene       | Ethylbenzene   | m-,p-Xylene   | o-Xylene       | Surrogate Recovery Efficiency [%] |
|------------------|-------------|----------------|---------------|----------------|---------------|----------------|-----------------------------------|
| North Birmingham | Park        | 1.79 ± 0.153   | 1.34 ± 0.0560 | 0.265 ± 0.0201 | 1.02 ± 0.0674 | 0.370 ± 0.0226 | 61.3 ± 5.16                       |
|                  | Residential | 1.58 ± 0.143   | 1.69 ± 0.492  | 0.316 ± 0.0776 | 1.23 ± 0.291  | 0.454 ± 0.127  | 63.5 ± 3.92                       |
| Harriman Park    | Park        | 1.35 ± 0.206   | 1.76 ± 0.401  | 0.409 ± 0.105  | 1.58 ± 0.400  | 0.597 ± 0.152  | 67.2 ± 4.68                       |
|                  | Residential | 1.43 ± 0.0199  | 1.93 ± 0.225  | 0.420 ± 0.0369 | 1.66 ± 0.130  | 0.616 ± 0.0547 | 73.4 ± 7.34                       |
| Woodward         | Park        | 0.665 ± 0.105  | 2.08 ± 0.130  | 0.316 ± 0.0201 | 1.07 ± 0.0737 | 0.432 ± 0.0342 | 59.8 ± 4.10                       |
|                  | Residential | 0.946 ± 0.170  | 2.67 ± 0.548  | 0.436 ± 0.0962 | 1.48 ± 0.331  | 0.579 ± 0.119  | 63.3 ± 5.02                       |
| Camden           | Park        | 0.297 ± 0.0304 | 1.09 ± 0.246  | 0.184 ± 0.0418 | 0.620 ± 0.140 | 0.240 ± 0.0503 | 50.4 ± 4.39                       |
|                  | Residential | 0.341 ± 0.0609 | 1.26 ± 0.118  | 0.290 ± 0.102  | 0.742 ± 0.128 | 0.290 ± 0.0529 | 59.6 ± 5.95                       |

Table 9S. Toluene:benzene (T:B) and m-,p-xylene:ethylbenzene (m-p-X:E) mass ratios (mean  $\pm$  standard deviation).

| Name             | Type        | Week 1             |                   | Week 2             |                   |
|------------------|-------------|--------------------|-------------------|--------------------|-------------------|
|                  |             | T:B                | m-,p-X:E          | T:B                | m-,p-X:E          |
| North Birmingham | Park        | 0.747 $\pm$ 0.0710 | 3.81 $\pm$ 0.0719 | 0.753 $\pm$ 0.0516 | 3.85 $\pm$ 0.0375 |
|                  | Residential | 0.810 $\pm$ 0.0443 | 3.82 $\pm$ 0.0367 | 1.06 $\pm$ 0.206   | 3.92 $\pm$ 0.0671 |
| Harriman Park    | Park        | 0.946 $\pm$ 0.141  | 3.84 $\pm$ 0.0179 | 1.30 $\pm$ 0.235   | 3.86 $\pm$ 0.0438 |
|                  | Residential | 1.13 $\pm$ 0.133   | 3.82 $\pm$ 0.140  | 1.35 $\pm$ 0.178   | 3.94 $\pm$ 0.0713 |
| Woodward         | Park        | 2.84 $\pm$ 0.606   | 3.44 $\pm$ 0.0628 | 3.18 $\pm$ 0.484   | 3.39 $\pm$ 0.0176 |
|                  | Residential | 3.09 $\pm$ 0.827   | 3.54 $\pm$ 0.0735 | 2.82 $\pm$ 0.165   | 3.39 $\pm$ 0.0132 |
| Camden           | Park        | 3.61 $\pm$ 0.737   | 3.38 $\pm$ 0.269  | 3.76 $\pm$ 1.24    | 3.37 $\pm$ 0.0313 |
|                  | Residential | 2.97 $\pm$ 0.546   | 3.42 $\pm$ 0.391  | 3.74 $\pm$ 0.595   | 2.67 $\pm$ 0.591  |

**Thank you** for participating in the ENACT July 2017 air quality measurement campaign!

“BTEX” stands for Benzene, Toluene, Ethylbenzene, and Xylenes, which are 4 pollutants that come from cars or some factories.

**While any amount of exposure will have some risk, the BTEX levels measured at your house are low. Our professional opinion is that you have very little risk from exposure to BTEX in your area.**

Organic Vapor Monitor



|              | Your Average Concentrations<br>( $\mu\text{g} / \text{m}^3$ ) | Average Outdoor Concentrations<br>( $\mu\text{g} / \text{m}^3$ ) | EPA Safe Level<br>( $\mu\text{g} / \text{m}^3$ ) |
|--------------|---------------------------------------------------------------|------------------------------------------------------------------|--------------------------------------------------|
| Benzene      | 1.7                                                           | 1.5 - 6.95                                                       | 30                                               |
| Toluene      | 1.9                                                           | 7.17 - 26.9                                                      | 5,000                                            |
| Ethylbenzene | 0.4                                                           | 0.59 - 2.06                                                      | 1,000                                            |
| Xylenes      | 2.2                                                           | 4.01 - 17.46                                                     | 100                                              |



*EnactAlabama.org*

For more reading on BTEX and their health effects, please see the enclosed pamphlets from the Centers for Disease Control’s Agency for Toxic Substances and Disease Registry.

This information should not be used for any purpose other than to share the results of an academic study with the community members who kindly invited us to their home. If you have any questions, please contact Virginia Tech researchers Dr. Julia Gohlke at (540) 231-7880 or Michael Milazzo at [Milazzo@vt.edu](mailto:Milazzo@vt.edu)

Fig. 8S. Example pamphlet distributed to community members who allowed deployment of passive samplers on their property. “Your Average Concentrations” are the values for the two weeks combined; the example data presented are from Harriman Park, Type Park, Site A. “Average Outdoor Concentrations” are ranges of the studies assessed in Bolden et al. 2015.<sup>4</sup> “EPA Safe Level” are inhalation Reference Concentrations.<sup>5-8</sup>

## References

- (1) Climate Data OnLine. National Oceanic and Atmospheric Administration, National Centers of Environmental Information: Asheville, North Carolina.
- (2) The, J. L.; The, C. L.; Johnson, M. A.; Shatalov, O. WRPLOT View. Lakes Environmental Software: Waterloo, Ontario 2016.
- (3) *Definition and Procedure for the Determination of the Method Detection Limit, Revision 2*; Environmental Protection Agency Office of Water: Washington, DC, USA, 2016.
- (4) Bolden, A. L.; Kwiatkowski, C. F.; Colborn, T. New Look at BTEX: Are Ambient Levels a Problem? *Environ. Sci. Technol.* **2015**, *49* (9), 5261–5276.
- (5) Chemical Assessment Summary: Benzene. *Integrated Risk Information System*. Environmental Protection Agency, National Center for Environmental Assessment: Washington, D.C., USA 2003, p 43.
- (6) Chemical Assessment Summary: Toluene. *Integrated Risk Information System*. Environmental Protection Agency, National Center for Environmental Assessment: Washington, D.C., USA 2005, p 33.
- (7) Chemical Assessment Summary: Ethylbenzene. *Integrated Risk Information System*. Environmental Protection Agency, National Center for Environmental Assessment: Washington, D.C., USA 1987, p 20.
- (8) Chemical Assessment Summary: Xylenes. *Integrated Risk Information System*. Environmental Protection Agency, National Center for Environmental Assessment: Washington, D.C., USA 2003, p 32.
